# Supplementary material for: Chronic Prosopis Glandulosa Treatment Blunts Neutrophil Infiltration and Enhances Muscle Repair after Contusion Injury
Source: PubMed Central journal article supplement (PMC4344562; doi:10.3390/nu7020815), 2015-01-23
Supplement: nutrients-07-00815-s001.pdf [file nutrients-07-00815-s001.pdf]

# J. MULLER

LABORATORIES (PTY) LTD

Reg. No.1980/004037/07  
ANALYTICAL CHEMISTS

S A N A S

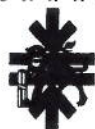

ACCREDITED  
LABORATORY

P.O. BOX 511  
PAARDEN EILAND 7420  
REP. OF SOUTH AFRICA  
TELEPHONE: 27-021-5118301/2  
FAX: 27-021-5103800  
E-mail: jmlabs@iafrica.com

OFFICE & LABORATORIES AT:  
30 MARINE DRIVE  
PAARDEN EILAND 7405  
REP. OF SOUTH AFRICA

Our Ref LN605879-8C-09

No T.0054  
Test Report

Date of Issue: 30 JUNE 2006

## Certificate of Analysis

PAGE 1 OF 2

**This is to certify that** the sample listed below was analysed

**SUBMITTED BY:** CONBRIO BRANDS  
P.O. BOX 291  
CENTURY CITY  
7446  
**ATTENTION:** G DEYSEL

**SAMPLE TYPE:** PLANT MATERIAL (DIABETIC SUPPLEMENT)

**SAMPLE MARKS:** "DIAVITE"

**DATE SAMPLE RECEIVED:** 05 MAY 2006  
**DATE ANALYSIS STARTED:** 12 MAY 2006  
**DATE ANALYSIS COMPLETED:** 30 JUNE 2006

Analysis relates only to the sample/s tested:

SEE ATTACHED PAGE 2

LABORATORY MANAGER  
C VISSER  
APPROVED SIGNATORY
