# Supplementary material for: Chronic Prosopis Glandulosa Treatment Blunts Neutrophil Infiltration and Enhances Muscle Repair after Contusion Injury
Source: PubMed Central journal article supplement (PMC4344562; doi:10.3390/nu7020815), 2015-01-23
Supplement: nutrients-07-00815-s002.pdf [file nutrients-07-00815-s002.pdf]

OFFICIAL METHODS OF ANALYSIS OF AOAC INTERNATIONAL 17TH EDITION REVISION #2, 2003

|                            |                    |                |
|----------------------------|--------------------|----------------|
|                            |                    | <u>g/100g</u>  |
| *QALNTRO (Ref AOAC 984.13) | Protein (N x 6,25) | 11,4           |
| *QALDF (Ref AOAC 985.29)   | Dietary Fibre      | 21,6           |
| *QALFAT (acid hydrolysis)  | Fat                | 2,62           |
| AOAC 971.18                | Fructose           | 4,12           |
| AOAC 971.18                | Glucose            | 0,89           |
| AOAC 971.18                | Sucrose            | <0,02          |
| AOAC 971.18                | Sorbitol           | <0,02          |
| AOAC 971.18                | Maltose            | 30,9           |
| AOAC 971.18                | Total sugars       | 35,9           |
| AOAC 950.46                | Moisture           | 7,14           |
| AOAC 942.05                | Ash                | 4,60           |
| By difference              | Carbohydrates      | 52,6           |
|                            |                    | <u>mg/100g</u> |
| AOAC 968.08                | Sodium (Na)        | 37             |
| AOAC 968.08                | Potassium (K)      | 1475           |
| AOAC 968.08                | Calcium (Ca)       | 172            |
| AOAC 968.08                | Magnesium (Mg)     | 114            |
| AOAC 968.08                | Zinc (Zn)          | 1,2            |
| AOAC 968.08                | Iron (Fe)          | 1,7            |
|                            |                    | <u>kJ/100g</u> |
|                            | Energy Value       | 1133           |
|                            |                    | <u>µg/kg</u>   |
| AOAC 990.33                | Aflatoxin          |                |
|                            | B <sub>1</sub>     | <2             |
|                            | B <sub>2</sub>     | <2             |
|                            | G <sub>1</sub>     | <2             |
|                            | G <sub>2</sub>     | <2             |

Values reported as less than (<) are lower than the limit of detection for the method employed.

\* Tested in accordance with SANAS accredited test methods

Analysis not marked with an asterisk, are not included in the SANAS Schedule of Accreditation of this laboratory.



ANALYST  
W vd MERWE



ANALYST  
E NEETHLING



ANALYST  
A BOTHA



LAB TECHNICIAN  
S THERON



ANALYST  
C VISSER



ANALYST  
S TERRY



LABORATORY MANAGER  
C VISSER  
APPROVED SIGNATORY
